# Supplementary material for: The Impact of Augmented Renal Clearance on Vancomycin Pharmacokinetics and Pharmacodynamics in Critically Ill Patients
Source: MDPI journal article supplement (doi:10.3390/jcm13082317), 2024-04-17
Supplement: s1 [file s1]

| Author, year                                 | Region, study period                 | Study purpose                                                                                                                                                               | Study design      | Population | N                                                                                                         | Age (years) Median (IQR), Mean ± SD   | Sex n (% male)                    | ARCdefinition (mL/min/1.73 m <sup>2</sup> ) <sup>a</sup> | CrCl determination method                                         | Vancomycin dosage regimen                                                                                                | Key findings                                                                                                                                                                                                                                                                                                                                                                                                                                                                                                                                                                                 |
|----------------------------------------------|--------------------------------------|-----------------------------------------------------------------------------------------------------------------------------------------------------------------------------|-------------------|------------|-----------------------------------------------------------------------------------------------------------|---------------------------------------|-----------------------------------|----------------------------------------------------------|-------------------------------------------------------------------|--------------------------------------------------------------------------------------------------------------------------|----------------------------------------------------------------------------------------------------------------------------------------------------------------------------------------------------------------------------------------------------------------------------------------------------------------------------------------------------------------------------------------------------------------------------------------------------------------------------------------------------------------------------------------------------------------------------------------------|
| Ishigo T et al. 2023 [1]4/17/2024 3:26:00 PM | Japan (January 2020 – December 2022) | - To explore factors linked with the attainment of target AUC during follow-up<br><br>- Provide a decision flowchart for achieving target AUC                               | R (multi-center)  | Mixed ICU  | 70                                                                                                        | 66 (56, 79)                           | 35(50)                            | ≥ 130                                                    | Calculated CG                                                     | LD : 25.4 (21.4, 29.1) mg/kg<br>MD: 26.5 (19.7, 34.2) mg/kg/day                                                          | <ul style="list-style-type: none"> <li>The prevalence of ARC was 15.7%. During follow-up, 70% of 70 met the target AUC, while the target was reached by only 45% of ARC patients.</li> <li>The number of VCM administered doses was significantly higher in those achieving the target AUC**, though, this significance vanished when considering only predicted AUC target values</li> <li>A decisional flowchart was developed based on achieving target AUC, dosing interval, and the CrCl.</li> </ul>                                                                                    |
| Ishigo T et al. 2023 [2]                     | Japan (January 2018-April 2022)      | To study the impact of ARC on early (day -1 and -2) AUCs deviations (defined as AUC deviation of ≥ 30% upward at TDM from AUC at initial dosing) of VCM                     | R (single-center) | Mixed ICU  | 141<br>ARC: 35<br>non - ARC:106                                                                           | ARC: 69(59-75)<br>non-ARC: 58 (47-63) | ARC: 23 (65.7) non ARC: 76 (71.7) | ≥ 130                                                    | Calculated CG                                                     | ID: 20.7 (16.3, 24.7) mg/kg<br>MD: 14.3 (11.7, 16.7) mg/kg                                                               | <ul style="list-style-type: none"> <li>Initial simulations compared to TDM revealed a significant increase in AUC<sub>24</sub> in ARC group (± SD:75.9 ± 112.8)*.</li> <li>During the TDM period, AUC<sub>0-24</sub>, AUC<sub>24-48</sub>, and AUC<sub>ss</sub> were significantly lower in ARC compared to the non-ARC (AUC<sub>ss</sub>: 338 [244-486] vs 504 [392-600] mg.h/L).</li> <li>AUC deviations were higher in the ARC group (57%) compared to the non-ARC group (16%)*.</li> <li>Patients in the ARC group were younger, had higher BMI and higher catecholamine use.</li> </ul> |
| Mikami R et al. 2022 [3]                     | Japan (April 2014 – July 2020)       | - To compare CrCl estimating methods and their correlation with VCM C <sub>trough</sub> / MD.<br>- To compare VCM C <sub>trough</sub> / MD between ARC and non-ARC patients | R (single-center) | Mixed ICU  | Actual ARC (14),<br>Borderline (130 mL/min (at the start and < 130 mL/min after that) (8)<br>non-ARC (43) | 69 (50-73)                            | 45(69.2)                          | > 130 mL/min                                             | 1) Measured (8-h)<br>2) Calculated (CG)<br>3) Calculated (KeGFR). | LD: (100-2000 mg)<br>MD: mg/kg/day<br>ARC: 34.2 (28.3-42.1)<br>Borderline: 42.3 (18.2-57.3)<br>non ARC: 29.4 (17.9-32.0) | <ul style="list-style-type: none"> <li>Measured CrCl demonstrated the strongest correlation with VCM C/D ratio ( r=-0.598)*, surpassing the calculated (KeGFR) (r = - 0.422) and CG (r = -0.426). However, none of the methods showed a significant correlation with non-ARC patients experiencing a change in renal function.</li> <li>The VCM C/D ratio was significantly lower in patients with the ARC group ( 0.24 kg/L) compared to non-ARC patients (0.52 kg/L)*.</li> </ul>                                                                                                          |

|                           |                                     |                                                                                                                                                                                                                                      |                   |                 |                                                                           |                                                          |                                                   |              |                      |                                                                                                                                 |                                                                                                                                                                                                                                                                                                                                                                                                                                                                                                                                                                                                                                                                                                                                                                |
|---------------------------|-------------------------------------|--------------------------------------------------------------------------------------------------------------------------------------------------------------------------------------------------------------------------------------|-------------------|-----------------|---------------------------------------------------------------------------|----------------------------------------------------------|---------------------------------------------------|--------------|----------------------|---------------------------------------------------------------------------------------------------------------------------------|----------------------------------------------------------------------------------------------------------------------------------------------------------------------------------------------------------------------------------------------------------------------------------------------------------------------------------------------------------------------------------------------------------------------------------------------------------------------------------------------------------------------------------------------------------------------------------------------------------------------------------------------------------------------------------------------------------------------------------------------------------------|
| Sahraei Z et al. 2022 [4] | Iran (April 2021 – June 2022)       | To compare VCM pK parameters in ARC patients between two different treatment regimens, BD(q12 h) and TDS (q8 h)                                                                                                                      | RCT               | Mixed ICU       | 56<br><br>BD (q 12 h): 28<br>TDS (q 8 h): 28                              | BD: 44.04 ± 16.55<br>TDS: 42.86 ± 11.83                  | BD: 17 (60)<br>TDS:16 (57)                        | ≥ 130 mL/min | Measured (8 h)       | LD: 20mg/kg<br>MD: 15 mg/kg                                                                                                     | <ul style="list-style-type: none"> <li>AUC, C<sub>trough</sub>, and peak concentrations were significantly lower in BD than in the TDS group.</li> <li>At a MIC of 1 mcg/ml, a higher percentage of TDS achieved the target AUC/MIC compared to BD (82.14% vs 46.42%, p = 0.006).</li> <li>Despite these differences, Ke, t<sub>1/2</sub>, CL, and V<sub>d</sub> showed no significant variation between the two groups</li> </ul>                                                                                                                                                                                                                                                                                                                             |
| Yu XY et al. 2022 [5]     | China (May 2014 to December 2019)   | To assess the predictive accuracy of PPK software programs ( JPKD and SmartDose) in estimating VCM Pk in patients with different renal function                                                                                      | R (single-center) | ICU and non-ICU | 388<br><br>ARC : 86<br>NFR (60 ≤ CrCl ≤ 130): 241<br>IRF: (CrCl < 60): 61 | ARC: 50.9 ± 15.1<br>NRF: 68.5 ± 13.4<br>IRF: 76.6 ± 13.2 | ARC: 62 (72.1)<br>NRF: 116 (48.1)<br>IRF: 36 (59) | ≥ 130        | Calculated (CKD-EPI) | Initial regimen (mg/kg)<br>ARC: 30.3 ± 6.4<br>NRF: 31.7 ± 8.1<br>Adjusted regimen: (mg/kg)<br>ARC: 39.4 ± 9.7<br>NRF 33.9 ± 9.8 | <ul style="list-style-type: none"> <li>Younger, taller, and heavier males were more prevalent in ARC patients.ARC correlated positively with postoperative and IRF (P= 0.028, P= 0.012) and negatively with CI, diabetes, and heart failure (P= 0.019, P= 0.028. P= 0.015).</li> <li>8.1% in ARC, 17.8% in NRF and 31.1 % in IRF experienced a more than 50% change in their creatinine levels post VCM treatment:</li> <li>Despite the initial and adjusted total daily doses being higher in ARC than NFR*, C<sub>trough</sub> levels were lower in ARC, with a higher percentage (84.9%) of ARC patients having C<sub>trough</sub> &lt; 10 mg/L.</li> <li>JPKD showed better precision in predicting C<sub>trough</sub> for the adjusted regimen</li> </ul> |
| Zhao J et al. 2022 [6]    | China ( September 2012 - July 2020) | <p>- To explore risk factors linked to ARC and its impact of PK/PD of VCM.</p> <p>- To assesses the efficacy of two scoring systems as screening tools to identify high ARC risk (defined as ARC score ≥ 7 and ARCTIC score ≥ 6)</p> | P (multi-center)  | ICU and non-ICU | 414<br><br>ARC: 88<br>non ARC: 326                                        | ARC: 50 (33-60)<br>non ARC: 64 (53-76)                   | ARC: 66 (75)<br>non ARC: 211 (64.7)               | ≥ 130        | Calculated (CG)      | Initial daily dose (g/day):<br>ARC: 2 (2-2)<br>Non-ARC: 2 (1-2)                                                                 | <ul style="list-style-type: none"> <li>Positive correlations with ARC included, male sex, age &lt; 50 years, overweight status, mechanical ventilation, and enteral nutrition while cardiovascular disease and higher neutrophil count were negative correlates.</li> <li>ARC patients more frequently fell below recommended targets for trough levels and AUC<sub>24</sub>/MIC compared to non ARC patients (p =0.003).</li> <li>Despite higher initial doses in ARC group, PK/PD indices had significantly lower values, negatively correlating with CrCl. Even when adjusted for dose, ARC levels</li> </ul>                                                                                                                                               |

|                        |                                  |                                                                                                  |                   |                   |     |             |            |              |                 |                                 |                                                                                                                                                                                                                                                                                                                                                                                                                                                                                                                                                                                                                                                                                                                                                                |
|------------------------|----------------------------------|--------------------------------------------------------------------------------------------------|-------------------|-------------------|-----|-------------|------------|--------------|-----------------|---------------------------------|----------------------------------------------------------------------------------------------------------------------------------------------------------------------------------------------------------------------------------------------------------------------------------------------------------------------------------------------------------------------------------------------------------------------------------------------------------------------------------------------------------------------------------------------------------------------------------------------------------------------------------------------------------------------------------------------------------------------------------------------------------------|
|                        |                                  |                                                                                                  |                   |                   |     |             |            |              |                 |                                 | <p>remained significantly lower than non ARC*.</p> <ul style="list-style-type: none"> <li>• Estimated CrCl was ineffective in predicting PK/PD values.</li> <li>• A high ARC risk score predicted subtherapeutic C<sub>trough</sub> and AUC<sub>24</sub>/, while the ARCTIC high specifically predicted subtherapeutic AUC<sub>24</sub>/MIC, (p = 0.013)</li> </ul>                                                                                                                                                                                                                                                                                                                                                                                            |
| Zhao S et al. 2021 [7] | China (January 2010 – June 2018) | Pop PK study of VCM to recommend dosage for patients with different renal function including ARC | R (single-center) | ICU and non - ICU | 209 | 66.0 ± 16.4 | 126 (60.3) | ≥ 130 mL/min | Calculated (CG) | 1875.0 (1461.9 - 2352.0) mg/day | <ul style="list-style-type: none"> <li>• ARC incidence was 24%.</li> <li>• A Pop PK model with two compartments was the best fit for VCM PK profile and a final model equation was formulated to represent the concentration of VCM change over itme.</li> <li>• The model evaluation indicated that the final model predictions agreed with the observed plasma concentrations of VCM.</li> <li>• Various dosing regimens were cacluated using the final model to assess their probability of achieving the desired target AUC<sub>24</sub> based on VCM CL and V<sub>d</sub>.</li> <li>• The dose of VCM increased with increasing CrCl for patients with CrCl ≤ 180 mL/min. Patients with a CrCl ≥ 180 mL/min did not need to increase the dose.</li> </ul> |

|                        |                                   |                                                                                                                                                   |                    |               |                                 |                                             |                                                |              |                 |                                                          |                                                                                                                                                                                                                                                                                                                                                                                                                                                                                                                                                                                                                                               |
|------------------------|-----------------------------------|---------------------------------------------------------------------------------------------------------------------------------------------------|--------------------|---------------|---------------------------------|---------------------------------------------|------------------------------------------------|--------------|-----------------|----------------------------------------------------------|-----------------------------------------------------------------------------------------------------------------------------------------------------------------------------------------------------------------------------------------------------------------------------------------------------------------------------------------------------------------------------------------------------------------------------------------------------------------------------------------------------------------------------------------------------------------------------------------------------------------------------------------------|
| Chen Y et al. 2020 [8] | China (January 2019 – June 2019)  | To study the impact of ARC on vancomycin TDM in patients undergoing neurosurgery                                                                  | R ( single center) | Neurosurgical | N=104<br>ARC: 26<br>non ARC: 78 | ARC: 33 (26,46)<br>non ARC: 56 (45, 62)     | ARC: 134 (72)<br><br>non ARC: 53/25 of 78 male | ≥ 130        | Calculated (CG) | ARC: 1.28 ± 0.52 g<br>non-ARC: 0.87 ± 0.43 g             | <ul style="list-style-type: none"> <li>Younger age, heavier weight and higher CrCl were identified as risk factors for ARC**.</li> <li>The mean C<sub>trough</sub> were significantly lower in the ARC group 6.45 mg/L (3.72, 8.64) compared to the non-ARC group 10.72 mg/L (6.97, 16.55)**, with fewer ARC patients achieving the target C<sub>trough</sub> (19.3% vs 40.03%).</li> <li>C<sub>trough</sub> was correlated positively with age (r = 0.236, P=0.017), while correlating negatively with CrCl (r = - 0.281, P = 0.004).</li> </ul>                                                                                             |
| Chu Y et al. 2020 [9]  | China (May 2013 to October 2016)  | To analyse factors affecting the C <sub>trough</sub> of VCM in patients with ARC                                                                  | R (single-center)  | Hospitalized  | ARC: 186<br>non ARC: 69         | ARC: 45 (33 - 57.25)<br>non ARC: 56 (49-63) | ARC: 134 (72)<br><br>non-ARC: 69 (57)          | ≥ 130 mL/min | Calculated (CG) | 1000 mg q 12 h                                           | <ul style="list-style-type: none"> <li>Younger age, heavier weight, higher CrCl and lower serum albumin, platelets count, and trough concentrations were identified as risk factors for ARC**.</li> <li>More than 60% of ARC patients had a C<sub>trough</sub> of &lt; 10 mg/L while only 2.69% had a C<sub>trough</sub> of &gt; 20mg/L.</li> <li>After subgrouping ARC patients into three groups based on the CrCl, it was found that age and CrCl were the main factors that caused a statistically significant difference in the C<sub>trough</sub> between the groups**. &lt; 40 years: C<sub>trough</sub>: 5.90 (2.70-13.88)</li> </ul> |
| Chu Y et al. 2020 [10] | China (July 2013 – December 2015) | A PopPk analysis was performed to provide a good model for VCM C <sub>trough</sub> prediction for ARC patients based on population PK parameters. | R (single-center)  | Hospitalized  | 95                              | 45.00 (30.00– 57.00)                        | 71(74.7)                                       | ≥ 130 mL/min | Calculated (CG) | (q6h, q8h or q12 h) with a daily dosage of 1000 –4000 mg | <ul style="list-style-type: none"> <li>A robust and reliable PopPK model was developed for predicting individual VCM PK parameters in ARC patients.</li> <li>A one-compartment model was used to estimate the population parameters.</li> <li>The age was identified as the most significant covariate in the final PopPK model.</li> <li>CL and V<sub>d</sub> in the final model were 8.52 L/h and 155.4 L.</li> </ul>                                                                                                                                                                                                                       |

|                               |                                      |                                                                                                                                                    |                   |                                                                                   |                                                  |                                          |                                       |              |                                    |                                                                 |                                                                                                                                                                                                                                                                                                                                                                                                                                                                                                                                                                                                                                                                                                                   |
|-------------------------------|--------------------------------------|----------------------------------------------------------------------------------------------------------------------------------------------------|-------------------|-----------------------------------------------------------------------------------|--------------------------------------------------|------------------------------------------|---------------------------------------|--------------|------------------------------------|-----------------------------------------------------------------|-------------------------------------------------------------------------------------------------------------------------------------------------------------------------------------------------------------------------------------------------------------------------------------------------------------------------------------------------------------------------------------------------------------------------------------------------------------------------------------------------------------------------------------------------------------------------------------------------------------------------------------------------------------------------------------------------------------------|
| Helset E et al. 2020 [11]     | Norway (May 2013 – October 2015)     | To observe the difference between CRRT and non-CRRT in achieving the target AUC <sub>24</sub> /MIC ratio of >400.                                  | P (single-center) | Mixed ICU                                                                         | 83<br>Non CRRT: ARC (21)<br>non - ARC group (22) | 54.5 (38-63)                             | 61 (73.5)                             | ≥ 130 mL/min | measured (24h)                     | MD: ARC: 44.4 (28.7-60.1) and non-ARC: 29.6 (21.3 - 38.0) mg/kg | <ul style="list-style-type: none"> <li>The AUC<sub>24</sub>/MIC ratio was higher in the CRRT group compared to the non-CRRT group*.</li> <li>Significant differences in vancomycin AUC<sub>24</sub>/MIC ratio were observed between the ARC group and the other groups, with the ARC group demonstrating the lowest ratio**</li> </ul>                                                                                                                                                                                                                                                                                                                                                                            |
| He J et al. 2020 [12]         | China (Januray 2013 – November 2018) | To determine the PK/PD of VCM and recommend an optimal dosage regimen for critically ill patients with ARC                                         | R (single-center) | Mixed ICU                                                                         | ARC: 139<br>non ARC: 141                         | ARC: 40.0 ±11<br><br>non-ARC: 55.0 ±11.0 | ARC:90(64.7)<br><br>non-ARC:75 (53.2) | ≥ 130 mL/min | Calculated (CG)                    | Initial dose: 15mg/kg q 12 h                                    | <ul style="list-style-type: none"> <li>Male patients, younger age and higher CrCl were more prevalent in ARC group**.</li> <li>All ICU patients had AUC<sub>24</sub> values below the recommended target. The ARC group had an even lower AUC<sub>24</sub> value (232.9 µg·h/mL) compared to the non-ARC group (316 µg·h/mL)</li> <li>77.7% of ARC patients and 68.8% of the non-ARC patients had C<sub>trough</sub> &lt; 10 mg/L**</li> <li>To achieve a target C<sub>trough</sub> of 10 mg/L, a daily dose of 46.0 and 35.5 mg/kg is recommended for ARC and non-ARC group, respectively</li> </ul>                                                                                                             |
| Morbitzer KA et al. 2019 [13] | USA (NR)                             | To determine if patients with hemorrhagic stroke experiencing ARC exhibited alterations in VCM PK parameters compared to those predicted by Pop PK | P (single-center) | Adult patients with ICH or aSAH admitted to the neurosciences intensive care unit | 17                                               | 63.3 ± 13.3                              | 6(35)                                 | ≥ 130        | Calculated (CG) and measured (8 h) | 15.1 ± 4.2 mg/kg q 8 h                                          | <ul style="list-style-type: none"> <li>The measured CrCl was significantly higher than the estimated (161.6 ± 16.7 vs 116.7 ± 10.3 mL/min)*.</li> <li>71% of patients experienced ARC, however, all the patients had enhanced CrCl on the day of vancomycin concentration measurements.</li> <li>The calculated k<sub>e</sub> and consequently the t<sub>1/2</sub> were significantly lower in the predicated values based on population data compared to the measured values**. On the other hand, there was no significant change in the V<sub>d</sub> between measured and predicted values. These alterations resulted in C<sub>trough</sub> lower than predicted (10.3 ± 4.3 vs 18.3 ± 8.6 ug/mL)</li> </ul> |
| Nelson NR et al. 2019 [14]    | USA (April 2014 – December 2015)     | To compare PopPk-based parameters using capping CrCl at 120                                                                                        | R (single-center) | Adult patients with TBI                                                           | 32                                               | 36 (24.5-52)                             | 23(72)                                | ≥ 130        | Calculated (CG)                    | 17.1 (13.2–19.2) mg/kg every 8 h                                | <ul style="list-style-type: none"> <li>75% of TBI patients had ARC.</li> <li>There were no significant differences found between predicted and patient-specific measurments of k<sub>e</sub> and C<sub>trough</sub> when using the non-capped CrCl**.</li> </ul>                                                                                                                                                                                                                                                                                                                                                                                                                                                  |

|                          |                                       |                                                                                                                                                                     |                   |                                 |                                                                                                              |                                                                            |          |              |                 |                                                                                                    |                                                                                                                                                                                                                                                                                                                                                                                                                                                                                                                                                                                                                                                                                                                                                                                                                                                                                                                                                                                                                                                                  |
|--------------------------|---------------------------------------|---------------------------------------------------------------------------------------------------------------------------------------------------------------------|-------------------|---------------------------------|--------------------------------------------------------------------------------------------------------------|----------------------------------------------------------------------------|----------|--------------|-----------------|----------------------------------------------------------------------------------------------------|------------------------------------------------------------------------------------------------------------------------------------------------------------------------------------------------------------------------------------------------------------------------------------------------------------------------------------------------------------------------------------------------------------------------------------------------------------------------------------------------------------------------------------------------------------------------------------------------------------------------------------------------------------------------------------------------------------------------------------------------------------------------------------------------------------------------------------------------------------------------------------------------------------------------------------------------------------------------------------------------------------------------------------------------------------------|
|                          |                                       | mL/min/1.73 and non-capping CrCl when determining VCM doses in patients with TBI                                                                                    |                   |                                 |                                                                                                              |                                                                            |          |              |                 |                                                                                                    | <ul style="list-style-type: none"> <li>Using the capped CrCl at 120 mL/min resulted in a significantly lower <math>k_e</math> [0.104 (0.104–0.104) vs. 0.13 (0.12–0.15)] and <math>C_{trough}</math> [16.3 (15.3–22.0) vs. 11.5 (7.8–13.7) mcg/mL] between predicted and measured values respectively*.</li> </ul>                                                                                                                                                                                                                                                                                                                                                                                                                                                                                                                                                                                                                                                                                                                                               |
| Ishii H et al. 2018 [15] | Japan ( January 2013 - December 2017) | To validate the nomogram used for dosing VCM in patients with ARC and to investigate how specific clinical conditions associated with ARC might affect its accuracy | R (single-center) | Adult patients receiving IV VCM | nomogram dosing: 177 age < 50: 23 age ≥ 50: 154                                                              | 73 (63-80)                                                                 | 109 (62) | NR           | NR              | 29.0 (16.8-35.6) mg/kg/day                                                                         | <ul style="list-style-type: none"> <li>Age was the sole factor linked to subtherapeutic <math>C_{trough}</math>, with patients &lt; 50 having lower levels (7.3 [5.2 - 9.9]) than those 50 and older (11.9[7.9-14.5]mcg/mL), (p = 0.001) while no significant difference were found in <math>C_{trough}</math> based on CrCl.</li> <li>Only 22% of patients &lt; 50 reached target <math>C_{trough}</math> compared to 44 % in the 50 and older group, with 74% having levels &lt; 10 mg/L, (p = 0.014).</li> <li>The nomogram dosing method achieved a 47% accuracy rate in attaining the desired <math>C_{trough}</math>, with only 7% exceeding the target.</li> <li>Specific patient conditions, like febrile neutropenia, solid tumor, and blood cancer were associated with a significant increase in VCM CL (p = 0.003, p = 0.026, and p = 0.017 respectively), these effects remained significant even after adjusting for age. On the contrary, VCM <math>C_{trough}</math> showed no significant association with these patient conditions.</li> </ul> |
| Chu Y et al. 2016 [16]   | China ( May 2013 - May 2015)          | To evaluate the impact of ARC on serum VCM concentration                                                                                                            | R (single-center) | Adult patients treated with VCM | 148<br>Group A: CrCl < 80 mL/min (42)<br>Group B: 80 ≤ CrCl < 130 mL/min (36)<br>Group C : ≥ 130 mL/min (70) | Group A<br>63.3 ± 15.1<br>Group B<br>58.9 ± 13.6<br>Group C<br>43.8 ± 15.9 | 97(66)   | ≥ 130 mL/min | Calculated (CG) | Initial dose: 1000 mg every 12 h<br>Adjusted dose for ARC: 1000mg every 8 h and 1500 mg every 12 h | <ul style="list-style-type: none"> <li>Younger age, low SCr, and GFR were the main factors associated with ARC*.</li> <li>Around 69.2% of the ARC group didn't achieve the target <math>C_{trough}</math></li> <li>VCM <math>C_{trough}</math> was negatively correlated with the CrCl (<math>R^2=0.699</math>, <math>R^2=0.488</math>)* and it was significantly lower in the ARC group despite the same dosage regimen.</li> <li>After dose adjustment to 1000mg every 8h, 2 patients increased from 3.7 to 5.2 ug/mL and 10.2 to 12.1 ug/mL.</li> </ul>                                                                                                                                                                                                                                                                                                                                                                                                                                                                                                       |

|                              |                                     |                                                                                                       |                                                 |                            |                                                                                                      |                                                        |                                          |       |                                                      |                                                                                                                                                     |                                                                                                                                                                                                                                                                                                                                                                                                                                                                                                                                                                                                                                                                                                                                                                                                                            |
|------------------------------|-------------------------------------|-------------------------------------------------------------------------------------------------------|-------------------------------------------------|----------------------------|------------------------------------------------------------------------------------------------------|--------------------------------------------------------|------------------------------------------|-------|------------------------------------------------------|-----------------------------------------------------------------------------------------------------------------------------------------------------|----------------------------------------------------------------------------------------------------------------------------------------------------------------------------------------------------------------------------------------------------------------------------------------------------------------------------------------------------------------------------------------------------------------------------------------------------------------------------------------------------------------------------------------------------------------------------------------------------------------------------------------------------------------------------------------------------------------------------------------------------------------------------------------------------------------------------|
|                              |                                     |                                                                                                       |                                                 |                            |                                                                                                      |                                                        |                                          |       |                                                      |                                                                                                                                                     | <ul style="list-style-type: none"> <li>When the dose was adjusted to 1500 mg every 12 h, only one patient increased from 4.8 to 8.2 ug/mL, which was still lower than the target C<sub>trough</sub>.</li> </ul>                                                                                                                                                                                                                                                                                                                                                                                                                                                                                                                                                                                                            |
| Hirai K et al. 2016 [17]     | Japan ( April 2013 - February 2016  | To identify the risk factors associated with ARC and to assess the impact of ARC on VCM PK parameters | retrospective observational                     | ICU and non-ICU            | n: 292<br>ARC: 48<br>non ARC: 244                                                                    | ARC: 57.5 (39.0 - 69.3)<br>non ARC: 74.0 (65.0 - 83.0) | ARC: 30 (62.5) non<br>ARC: 155 (63.5)    | ≥ 130 | Calculated (CG)                                      | ARC: 35.7 (30.5-40.0)<br>non ARC: 27.1 (19.3 - 36.6)<br>mg/kg/day                                                                                   | <ul style="list-style-type: none"> <li>The prevalence of ARC was 16.4%.</li> <li>Younger age (≤ 60 years), presence of brain injury and febrile neutropenia, and a volume of infusion fluid ≥ 1500 mL/day were identified as independent risk factors for ARC.</li> <li>There was a significant correlation between CrCl and VCM CL in ARC patients (r = 0.8726, P = 0.0001).</li> <li>ARC patients had higher CL VCM values compared to non-ARC patients</li> <li>Despite higher doses, the ARC group exhibited lower C<sub>trough</sub> ( 7.4 [5.2 - 11.6] vs 12.2 [8.9 - 16.3], p &lt; 0.0001) and AUC ( 447 [400-554] vs 554 [442-720], p = 0007).</li> <li>A higher percentage of patients with ARC (68.8%) had C<sub>trough</sub> below the desired target compared to the non-ARC (32.8) (p &lt; 0.0001)</li> </ul> |
| Baptista JP et al. 2014 [18] | Portugal ( over 13 months)          | To develop a dosing nomogram for VCM and evaluate its efficiency in critically ill patients.          | R (single-center) followed by P (single-center) | Sepsis ICU                 | 104<br><br>Group1 retrospective cohort (79)<br><br>Group 2 prospective cohort (nomogram dosing) (25) | Group 1: 57.8 (15.5)<br>Group 2: 59.9 (17.2)           | Group 1: 52 (66.0)<br>Group 2: 17 (68.0) | >130  | Measured (8h)                                        | LD: group 1: 14.3 (12.8 - 17.6) mg/kg<br>group 2: 18.8 (16.7-21.4)<br><br>Total dose: group 1: 3160 (2520-3880) mg/day<br>group 2: 3584 (2976-4138) | <ul style="list-style-type: none"> <li>The incidence of ARC was 36% and 40% in groups 1 and 2 respectively.</li> <li>Group 2 had a significantly higher rate of target VCM serum concentration attainment (84%) compared to group 1 (51%)**</li> <li>There was a significant correlation between CrCl and VCM CL on day 1 (r<sup>2</sup> = 0.66)*.</li> <li>After applying the proposed nomogram all ARC patients in group 2 achieved desired therapeutic concentrations, whereas only 28% of ARC patients in group 1 were able to achieve the target concentration.</li> <li>VCM serum concentrations between 20 to 30 mg/L were considered adequate.</li> </ul>                                                                                                                                                          |
| Campassi M et al. 2014 [19]  | NR ( October 2011 - September 2012) | To investigate the incidence of ARC and its impact on vancomycin                                      | P (single-center)                               | Mixed medical-surgical ICU | n: 363<br>44 (received VCM)                                                                          | ARC 48±15<br>non- ARC 65±17                            | 103(28.4)                                | ≥ 120 | A comparison of the measured (24) vs Calculated (CG) | LD: 15 mg/kg<br>MD: 30 mg/kg/day                                                                                                                    | <ul style="list-style-type: none"> <li>103 patients (28%) experienced ARC.</li> <li>Patients with ARC were younger, were more frequently admitted for obstetric and trauma-related reasons, had lower APACHE II scores, had</li> </ul>                                                                                                                                                                                                                                                                                                                                                                                                                                                                                                                                                                                     |

|                            |                         |                                                                                                               |                   |                                 |    |                                             |        |            |                 |                   |                                                                                                                                                                                                                                                                                                                                                                                                                                                                                                                                                                                                                                                                                                                                                                                                                                                                                                                                                                             |
|----------------------------|-------------------------|---------------------------------------------------------------------------------------------------------------|-------------------|---------------------------------|----|---------------------------------------------|--------|------------|-----------------|-------------------|-----------------------------------------------------------------------------------------------------------------------------------------------------------------------------------------------------------------------------------------------------------------------------------------------------------------------------------------------------------------------------------------------------------------------------------------------------------------------------------------------------------------------------------------------------------------------------------------------------------------------------------------------------------------------------------------------------------------------------------------------------------------------------------------------------------------------------------------------------------------------------------------------------------------------------------------------------------------------------|
|                            |                         | concentrations in ICU patients                                                                                |                   |                                 |    |                                             |        |            |                 |                   | <p>larger urine volume and higher elimination of electrolytes compared to non-ARC patients**</p> <ul style="list-style-type: none"> <li>• While the estimated and the 24 CrCl were significantly correlated, they did not match very closely, with the accuracy and specificity of the estimated for identifying ARC being 39.8% and 90.8%, respectively</li> <li>• 24 h CrCl was positively correlated with age (<math>R^2 = 0.28</math>) * and negatively correlated with VCM concentrations (<math>R^2 = -0.26</math>, <math>P &lt; 0.0001</math>),</li> <li>• Regardless of increasing the dose, none of the ARC patients reached the target concentrations</li> </ul>                                                                                                                                                                                                                                                                                                  |
| Minkute R et al. 2013 [20] | Lithuania (2010 - 2011) | To estimate the prevalence of ARC and its effect on VCM trough concentrations by employing VSCss for analysis | R (single-center) | Patients who had measured VSCss | 36 | ARC 45.5 (15); 21–66 non-ARC 54 (27); 22–86 | 29(80) | $\geq 130$ | Calculated (CG) | 1000 -4000 mg/day | <ul style="list-style-type: none"> <li>• ARC had a prevalence of 50%</li> <li>• Younger age, mechanical ventilation, and hemodynamic instability were significantly predominant in ARC patients**.</li> <li>• Within the ARC group, 34.2% did not achieve therapeutic VCM concentrations and had significantly lower <math>C_{trough}</math> despite higher doses**.</li> <li>• A larger deviation in the subtherapeutic concentration due to the distribution of doses within groups was also observed in the ARC group.</li> <li>• Different cutoff values for estimated CrCl (CG) were analyzed to predict trough VSC and a negative correlation was observed, particularly strong when <math>CrCl \geq 150</math> mL/min (<math>r^2 = 0.581</math>; <math>r^2 = 0.224</math>; <math>P = 0.005</math>).</li> <li>• Gender and vancomycin dose were identified as the two most important factors in the prediction model for trough VSCss in patients with ARC</li> </ul> |



|                              |                                         |                                                                              |                   |            |                                |                                      |                                      |       |               |                                                                                                                                             |                                                                                                                                                                                                                                                                                                                                                                                                                                                                                                                                               |
|------------------------------|-----------------------------------------|------------------------------------------------------------------------------|-------------------|------------|--------------------------------|--------------------------------------|--------------------------------------|-------|---------------|---------------------------------------------------------------------------------------------------------------------------------------------|-----------------------------------------------------------------------------------------------------------------------------------------------------------------------------------------------------------------------------------------------------------------------------------------------------------------------------------------------------------------------------------------------------------------------------------------------------------------------------------------------------------------------------------------------|
| Baptista JP et al. 2012 [21] | Portugal ( March 2006 - February 2008.) | To investigate the effect of ARC on VCM serum concentrations in ICU patients | P (single-center) | Sepsis ICU | 93<br>ARC: 37<br>Non - ARC: 56 | ARC 41(32–56)<br>non- ARC 70 (52–79) | ARC: 40 (71.4)<br>non-ARC: 29 (78.4) | > 130 | Measured (24) | LD: ARC: 1.0 (1.0-1.5) g<br>non- ARC : 1.0 (1.0 - 1.1) g<br><br>Perfusion dose: ARC: 30 (25.0 - 32.2)mg/kg<br>non-ARC: 30 (26.7-34.4) mg/kg | <ul style="list-style-type: none"> <li>• ARC was prevalent in 40% of patients.</li> <li>• Young age, less severe illness, and trauma as the cause of admission were significantly prevalent in ARC patients**.</li> <li>• ARC patients experienced lower serum VCM concentrations than the non-ARC group on the first, second, and third day of VCM therapy (p &lt; 0.01)</li> <li>• ARC patients reached therapeutic levels on day 3. There was a negative correlation between VCM concentrations and CrCl (r<sup>2</sup> –0.57)*</li> </ul> |
|------------------------------|-----------------------------------------|------------------------------------------------------------------------------|-------------------|------------|--------------------------------|--------------------------------------|--------------------------------------|-------|---------------|---------------------------------------------------------------------------------------------------------------------------------------------|-----------------------------------------------------------------------------------------------------------------------------------------------------------------------------------------------------------------------------------------------------------------------------------------------------------------------------------------------------------------------------------------------------------------------------------------------------------------------------------------------------------------------------------------------|

<sup>a</sup>ARC cut-off is reported in mL/min/1.73 m<sup>2</sup> unless indicated otherwise, \* indicates p < 0.001 and \*\* indicates p < 0.05

Abbreviations: APACHE II score, acute physiology and chronic health evaluation II score; ARC, augmented renal clearance; ARCTIC, augmented renal clearance in trauma intensive care; aSAH, aneurysmal subarachnoid hemorrhage; AUC, area under the plasma concentration-time curve; BMI, body mass index; C/D, trough plasma concentration / maintenance dose ratio; CKD-EPI, Chronic Kidney Disease Epidemiology Collaboration; CL, clearance; CrCl, creatinine clearance; CRRT, continuous renal replacement therapy; C<sub>trough</sub>, trough concentration; GC, Cockcroft-Gault; GFR, glomerular filtration rate; ICH, intracerebral hemorrhage; ICU, intensive care unit; IQR, interquartile range; IRF, impaired renal function; IV, intravenous; JPKD, JavaPK for Desktop; K<sub>e</sub>, elimination rate constant; KeGFR, KineticGFR equation; LD, loading dose; MD, maintenance dose; MIC, minimum inhibitory concentration; NR, not reported; NRF, normal renal function; P, prospective; PD, pharmacodynamics; PK, pharmacokinetic; PopPK, population pharmacokinetic; q, dose frequency; R, retrospective; SCr, serum creatinine; SD, standard variation; TDM, therapeutic drug monitoring; t<sub>1/2</sub>, half-life; TBI, traumatic brain injury; V<sub>d</sub>, volume of distribution; VCM, vancomycin; VSCss, steady state trough vancomycin serum concentrations;

## References

1. Ishigo, T.; Fujii, S.; Ibe, Y.; Aigami, T.; Nakano, K.; Fukudo, M.; Yoshida, H.; Tanaka, H.; Ebihara, F.; Maruyama, T.; et al. Flowchart for Predicting Achieving the Target Area under the Concentration-Time Curve of Vancomycin in Critically Ill Japanese Patients: A Multicenter Retrospective Study. *Journal of Infection and Chemotherapy* **2023**, S1341321X23002738, doi:10.1016/j.jiac.2023.11.001.
2. Ishigo, T.; Ibe, Y.; Fujii, S.; Kazuma, S.; Aigami, T.; Kashiwagi, Y.; Takada, R.; Takahashi, S.; Fukudo, M.; Toda, T. Effect of Renal Clearance on Vancomycin Area under the Concentration-Time Curve Deviations in Critically Ill Patients. *J Infect Chemother* **2023**, 29, 769–777, doi:10.1016/j.jiac.2023.04.018.
3. Mikami, R.; Imai, S.; Hayakawa, M.; Sugawara, M.; Takekuma, Y. Clinical Applicability of Urinary Creatinine Clearance for Determining the Initial Dose of Vancomycin in Critically Ill Patients. *J Infect Chemother* **2022**, 28, 199–205, doi:10.1016/j.jiac.2021.10.008.
4. Sahraei, Z.; Saffaei, A.; Alavi Darazam, I.; Salamzadeh, J.; Shabani, M.; Shokouhi, S.; Sarvmeili, N.; Hajiesmaeili, M.; Zangi, M. Evaluation of Vancomycin Pharmacokinetics in Patients with Augmented Renal Clearances: A Randomized Clinical Trial. *Front Pharmacol* **2022**, 13, 1041152, doi:10.3389/fphar.2022.1041152.
5. Yu, Y.-X.; Lu, J.; Lu, H.; Li, L.; Li, J.-J.; Shi, L.; Duan, L.-F.; Zhuang, Z.-W.; Xue, S.-D.; Shen, Y.; et al. Predictive Performance of Reported Vancomycin Population Pharmacokinetic Model in Patients with Different Renal Function Status, Especially Those with Augmented Renal Clearance. *Eur. j. hosp. pharm., Sci. pract.* **2022**, 29, e6–e14, doi:10.1136/ejhp-pharm-2020-002477.
6. Zhao, J.; Fan, Y.; Yang, M.; Liang, X.; Wu, J.; Chen, Y.; Guo, B.; Zhang, H.; Wang, R.; Zhang, F.; et al. Association between Augmented Renal Clearance and Inadequate Vancomycin Pharmacokinetic/Pharmacodynamic Targets in Chinese Adult Patients: A Prospective Observational Study. *Antibiotics (Basel)* **2022**, 11, doi:10.3390/antibiotics11070837.
7. Zhao, S.; He, N.; Zhang, Y.; Wang, C.; Zhai, S.; Zhang, C. Population Pharmacokinetic Modeling and Dose Optimization of Vancomycin in Chinese Patients with Augmented Renal Clearance. *Antibiotics (Basel)* **2021**, 10, doi:10.3390/antibiotics10101238.
8. Chen, Y.; Liu, L.; Zhu, M. Effect of Augmented Renal Clearance on the Therapeutic Drug Monitoring of Vancomycin in Patients after Neurosurgery. *J Int Med Res* **2020**, 48, 300060520949076, doi:10.1177/0300060520949076.
9. Chu, Y.; Luo, Y.; Jiang, M.; Zhou, B. Application of Vancomycin in Patients with Augmented Renal Clearance. *Eur. j. hosp. pharm., Sci. pract.* **2020**, 27, 276–279, doi:10.1136/ejhp-pharm-2018-001781.
10. Chu, Y.; Luo, Y.; Ji, S.; Jiang, M.; Zhou, B. Population Pharmacokinetics of Vancomycin in Chinese Patients with Augmented Renal Clearance. *J Infect Public Health* **2020**, 13, 68–74, doi:10.1016/j.jiph.2019.06.016.
11. Helset, E.; Nordoy, I.; Sporse, H.; Bakke, V.D.; Bugge, J.F.; Gammelsrud, K.W.; Zucknick, M.; von der Lippe, E. Factors Increasing the Risk of Inappropriate Vancomycin Therapy in ICU Patients: A Prospective Observational Study. *Acta Anaesthesiol Scand* **2020**, 64, 1295–1304, doi:10.1111/aas.13658.
12. He, J.; Yang, Z.-T.; Qian, X.; Zhao, B.; Mao, E.-Q.; Chen, E.-Z.; Bian, X.-L. A Higher Dose of Vancomycin Is Needed in Critically Ill Patients with Augmented Renal Clearance. *Transl. androl. urol.* **2020**, 9, 2166–2171, doi:10.21037/tau-20-1048.
13. Morbitzer K.; Jordan D.; Sullivan K.; Durr E.; Olm-Shipman C.; Rhoney D. Enhanced Renal Clearance and Impact on Vancomycin Trough Concentration in Patients with Hemorrhagic Stroke. *Pharmacotherapy* **2016**, 36, e218, doi:10.1002/phar.1877.
14. Nelson, N.R.; Morbitzer, K.A.; Jordan, J.D.; Rhoney, D.H. The Impact of Capping Creatinine Clearance on Achieving Therapeutic Vancomycin Concentrations in Neurocritically Ill Patients with Traumatic Brain Injury. *Neurocrit Care* **2019**, 30, 126–131, doi:10.1007/s12028-018-0583-z.
15. Ishii, H.; Hirai, K.; Sugiyama, K.; Nakatani, E.; Kimura, M.; Itoh, K. Validation of a Nomogram for Achieving Target Trough Concentration of Vancomycin: Accuracy in Patients With Augmented Renal Function. *Ther Drug Monit* **2018**, 40, 693–698, doi:10.1097/FTD.0000000000000562.
16. Chu, Y.; Luo, Y.; Qu, L.; Zhao, C.; Jiang, M. Application of Vancomycin in Patients with Varying Renal Function, Especially Those with Augmented Renal Clearance. *Pharm biol* **2016**, 54, 2802–2806.
17. Hirai, K.; Ishii, H.; Shimoshikiryō, T.; Shimomura, T.; Tsuji, D.; Inoue, K.; Kadoiri, T.; Itoh, K. Augmented Renal Clearance in Patients With Febrile Neutropenia Is Associated With Increased Risk for Subtherapeutic Concentrations of Vancomycin. *Ther Drug Monit* **2016**, 38, 706–710.
18. Baptista, J.P.; Roberts, J.A.; Sousa, E.; Freitas, R.; Devesa, N.; Pimentel, J. Decreasing the Time to Achieve Therapeutic Vancomycin Concentrations in Critically Ill Patients: Developing and Testing of a Dosing Nomogram. *Crit Care* **2014**, 18, 654, doi:10.1186/s13054-014-0654-2.
19. Campassi, M.L.; Gonzalez, M.C.; Masevicius, F.D.; Vazquez, A.R.; Moseinco, M.; Navarro, N.C.; Previgliano, L.; Rubatto, N.P.; Benites, M.H.; Estenssoro, E.; et al. [Augmented Renal Clearance in Critically Ill Patients: Incidence, Associated Factors and Effects on Vancomycin Treatment]. *Rev. bras. ter. intensiva* **2014**, 26, 13–20.
20. Minkute, R.; Briedis, V.; Steponaviciute, R.; Vitkauskienė, A.; Maciulaitis, R. Augmented Renal Clearance—an Evolving Risk Factor to Consider during the Treatment with Vancomycin. *J Clin Pharm Ther* **2013**, 38, 462–467, doi:10.1111/jcpt.12088.
21. Baptista, J.P.; Sousa, E.; Martins, P.J.; Pimentel, J.M. Augmented Renal Clearance in Septic Patients and Implications for Vancomycin Optimisation. *Int J Antimicrob Agents* **2012**, 39, 420–423, doi:10.1016/j.ijantimicag.2011.12.011.
